# Supplementary material
Source: Springer Nature journal article supplement (https://www.springermedizin.de/resource/supplementary/12937_2010_302_MOESM2_ESM.pdf/25654822)

**CS (nmol/mg protein)**

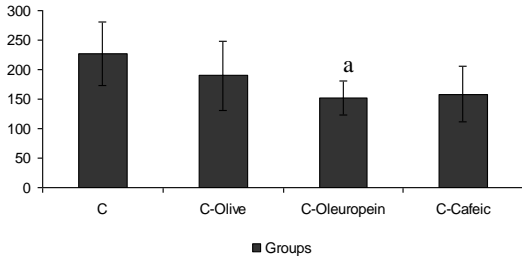

**CS (nmol/mg protein)**

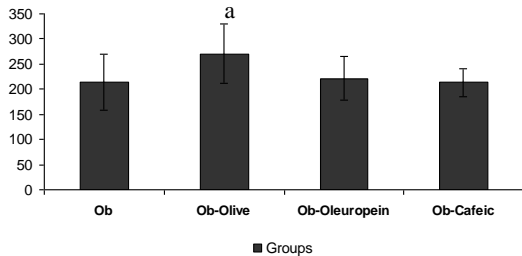

Supplement: MOESM2 [file 25654822]
